# Supplementary material
Source: PubMed Central journal article supplement (PMC5918134)
Supplement: NIHMS959818-supplement-Supplementary_Text___Figures.pdf [file NIHMS959818-supplement-Supplementary_Text___Figures.pdf]

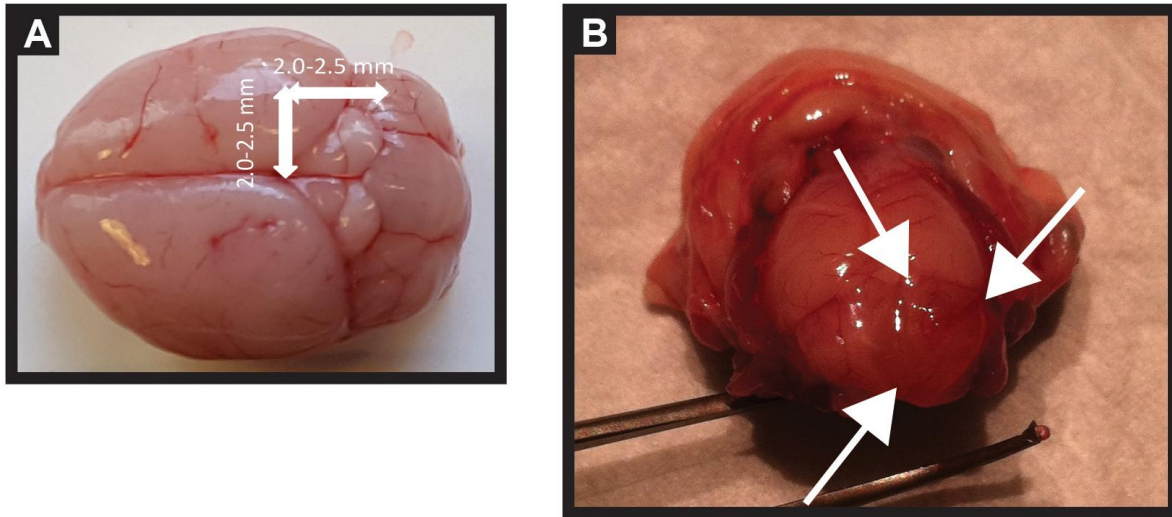

### Supplementary Figure 1

Tumor cell implantation into the mouse cerebellum.

Orthotopic medulloblastoma model. (A) Schematic of a mouse brain indicating the coordinates for stereotactic implantation of medulloblastoma cells in the cerebellum. (B) Human medulloblastoma (D283-MED, white arrow) in the right hemisphere of the cerebellum of a nude mouse 4 weeks after stereotactic implantation.

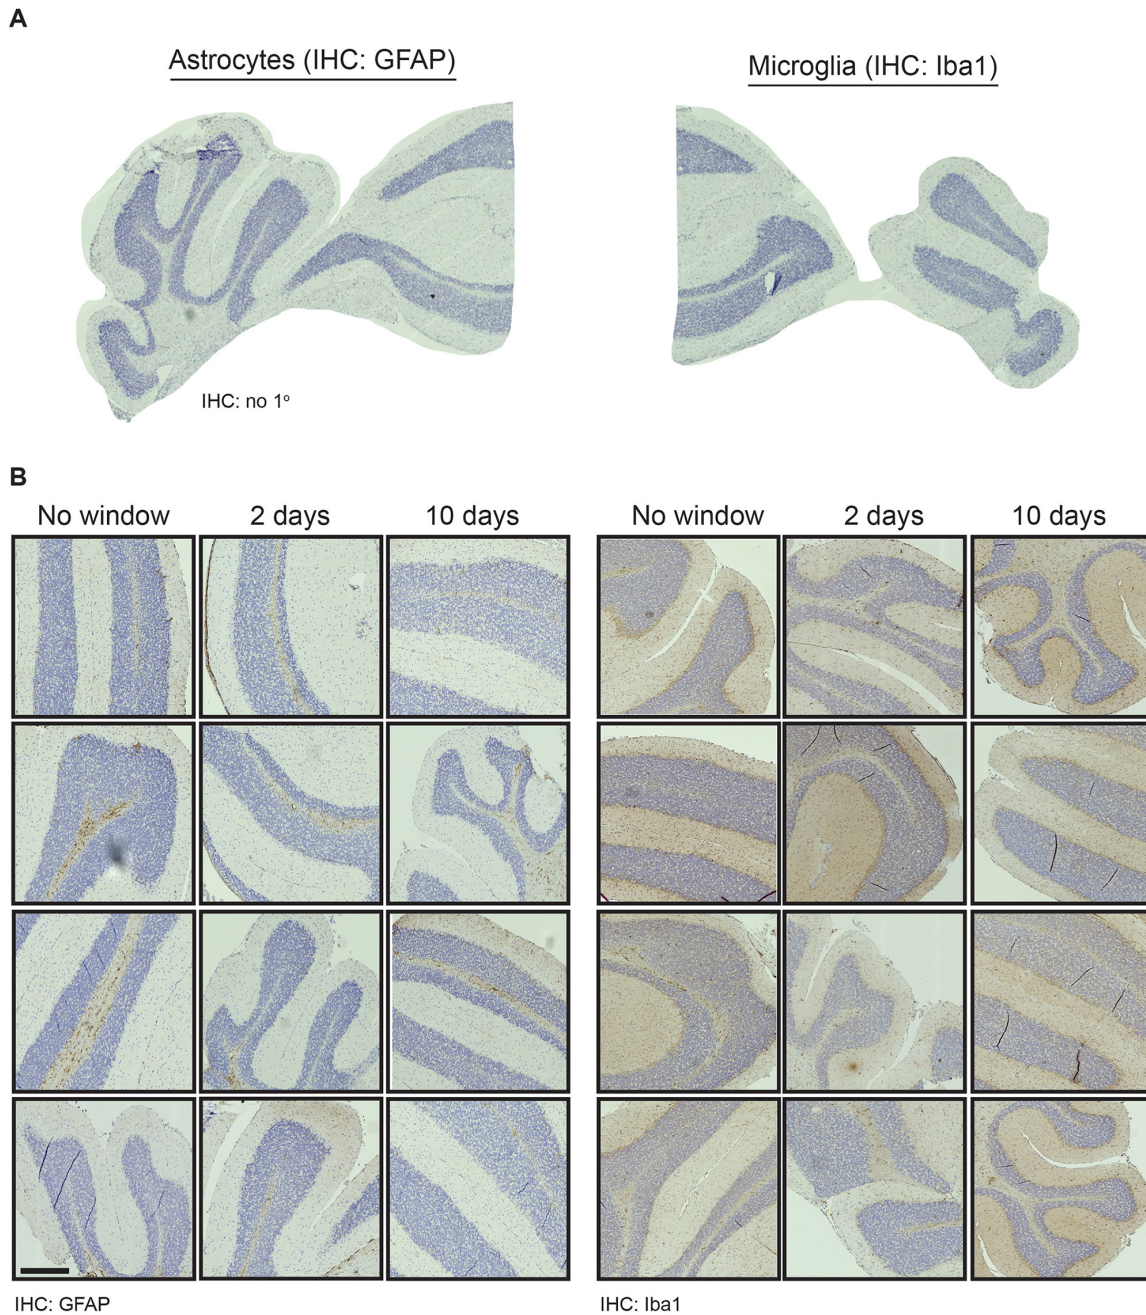

### Supplementary Figure 2

Reactive gliosis was monitored in cerebellum under window.

A) No primary antibody control IHC with Hematoxylin counterstain reveals intact granular layer in proximity of the window (left for GFAP, right for Iba1). (B) Four representative IHC images of GFAP (left) and Iba1 (right) in “no window” controls, 2 and 10 days post surgery. Both astrocytes and microglia are present in white matter tracts and sparsely in gray matter (scale bar = 200µm). Primary antibodies: mouse anti-GFAP Cat. No. M0761 (DAKO) 1:50 diluted in 5% NGS; rabbit anti-Iba1 Cat. No. 019-19741 (WAKO) 1:500 diluted in 5% NGS. Polymer HRP conjugated secondary antibodies (DAKO) were used (Cat. No. K4011 for rabbit; K4007 for mouse). HRP reaction developed with DAB + substrate reagent from DAKO (Cat. No. K3468).
